# Supplementary material for: The study of learning outcome of atherosclerotic cardiovascular disease (ASCVD) prevention by card game added on interactive lecture and group activity
Source: Research Square preprint supplement (doi:10.21203/rs.3.rs-7319496/v1), 2025-09-22
Supplement: Supplementary file 1 [file 7049a96737fb35db64f85019.pdf]

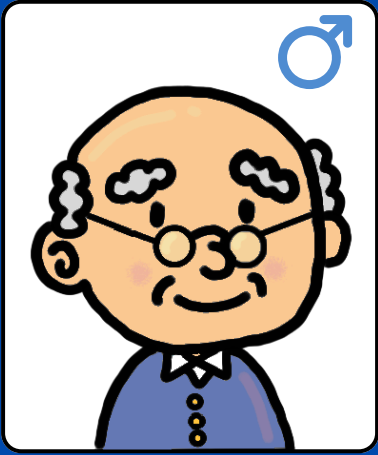

Age 70

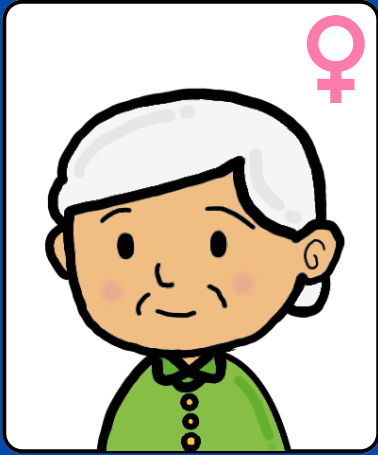

Age 70

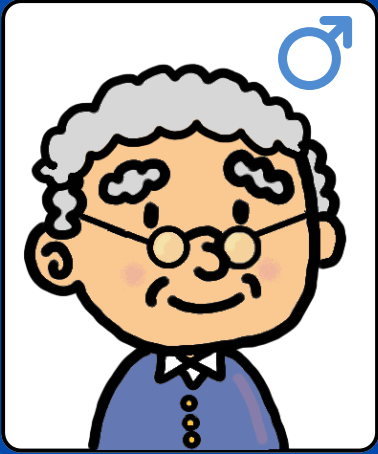

Age 60

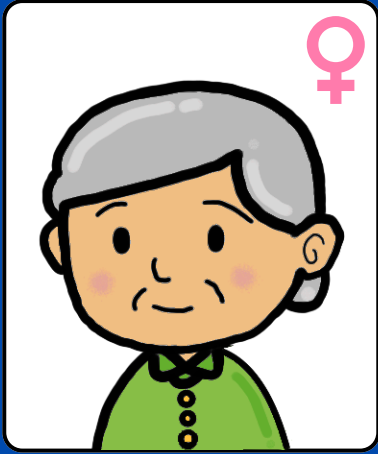

Age 60

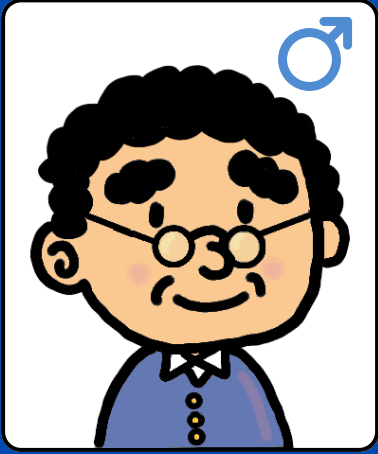

Age 50  
Mom died of MI aged 60

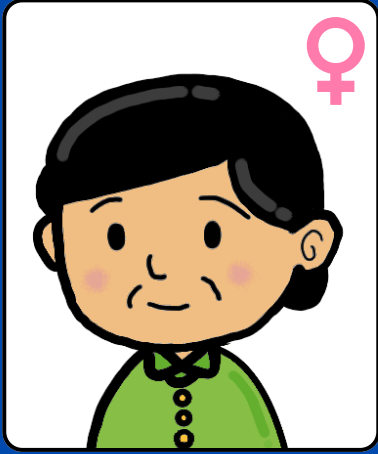

Age 50

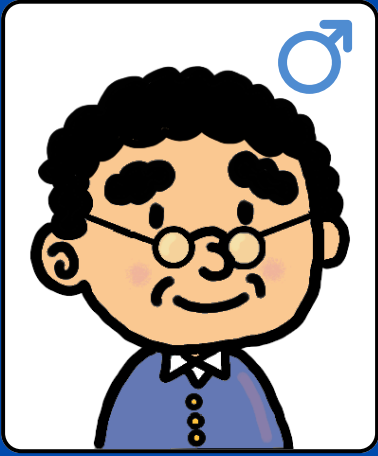

Age 50  
Mom died of MI aged 50

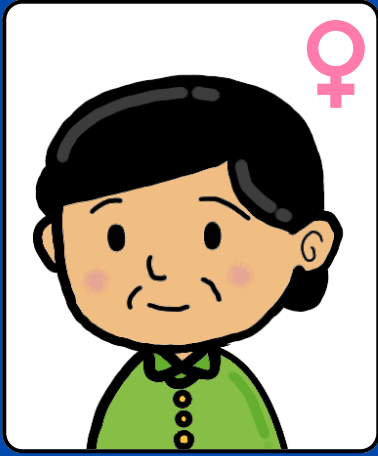

Age 50  
Dad died of stroke aged 55

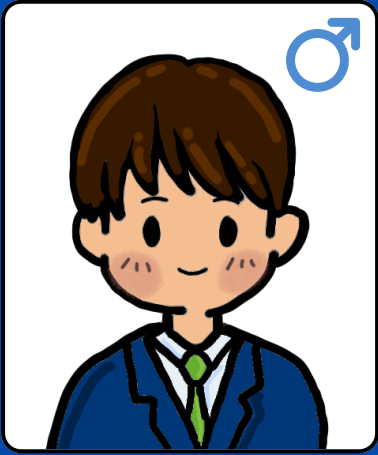

Age 40  
Dad died of MI aged 50

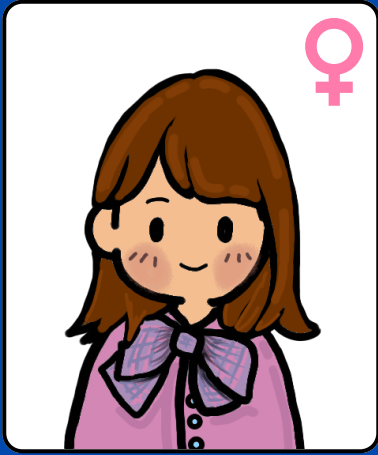

Age 40  
Mom died of stroke aged 60

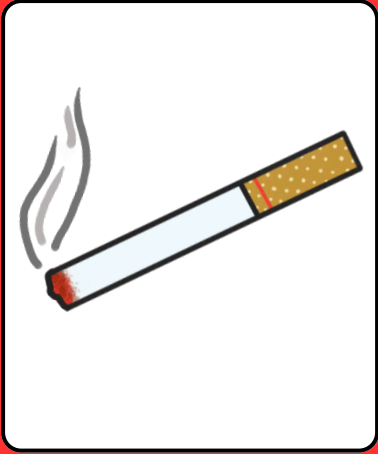

Smoking

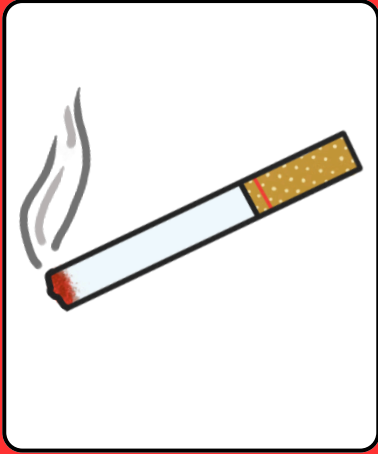

Smoking

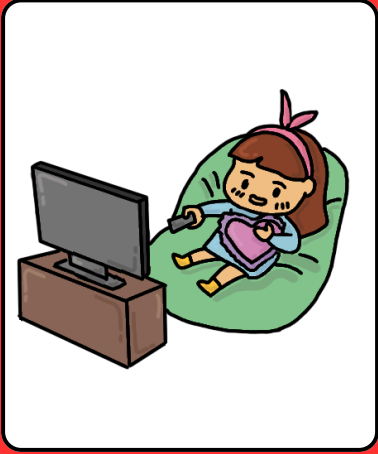

Sedentary lifestyle

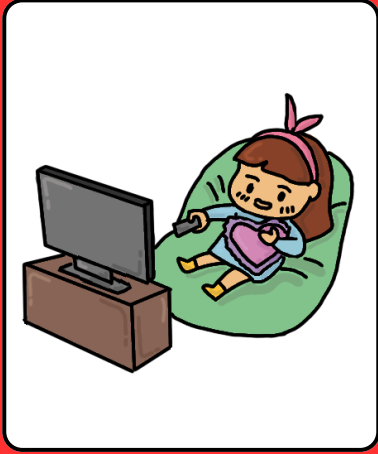

Sedentary lifestyle

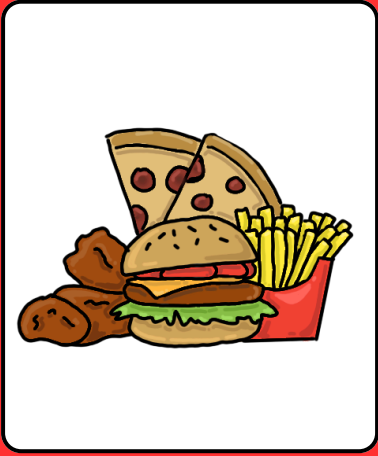

Unhealthy diet

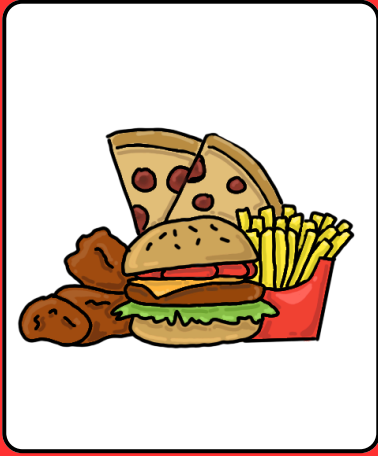

Unhealthy diet

Ht 1.6 m

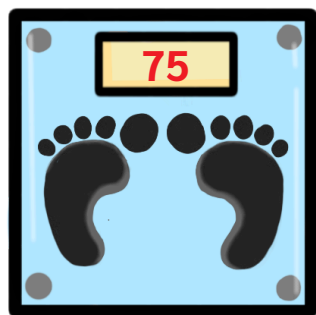

BMI 29.3 kg/m<sup>2</sup>

Ht 1.6 m

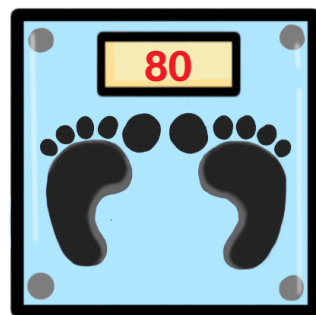

BMI 31.3 kg/m<sup>2</sup>

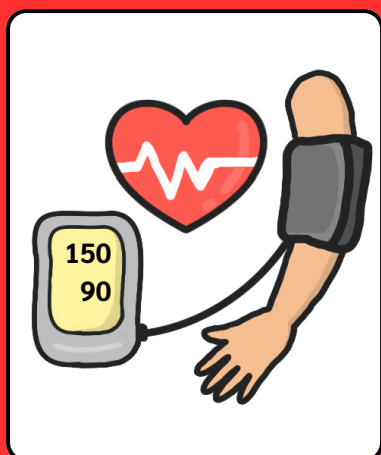

BP 150/90 mmHg

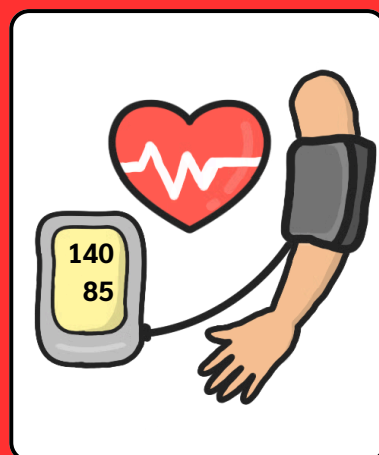

Home BP  
140/85 mmHg

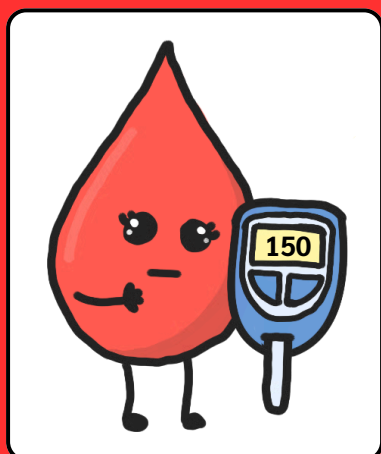

FBS 150 mg/dl

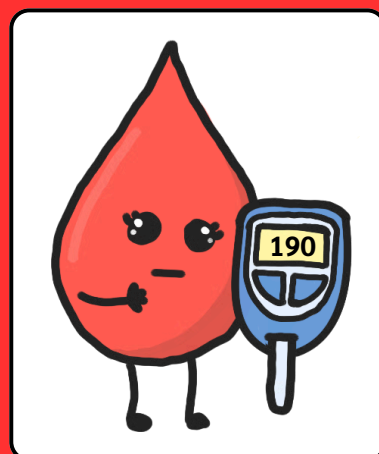

FBS 190 mg/dl

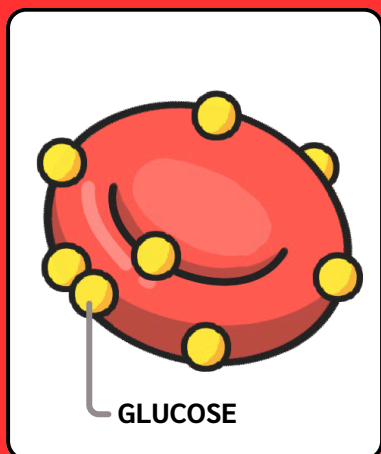

HbA1C 7.5%

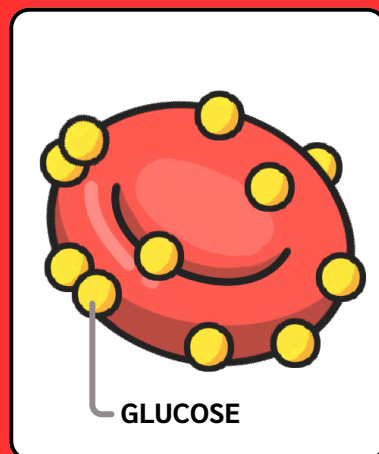

HbA1C 9.0%

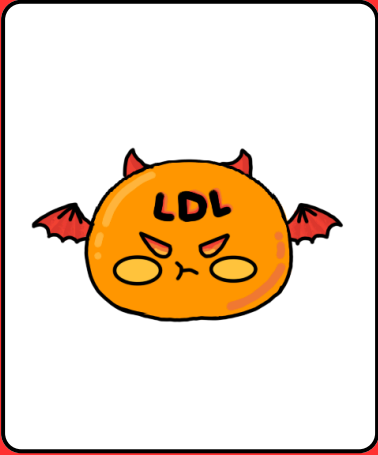

LDL - C 195 mg/dl

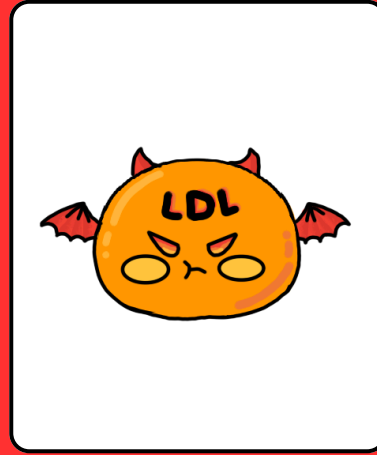

LDL - C 210 mg/dl

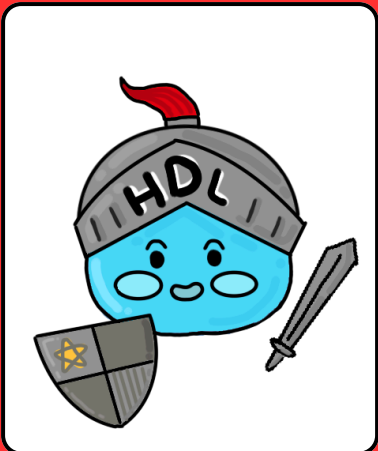

HDL - C 35 mg/dL

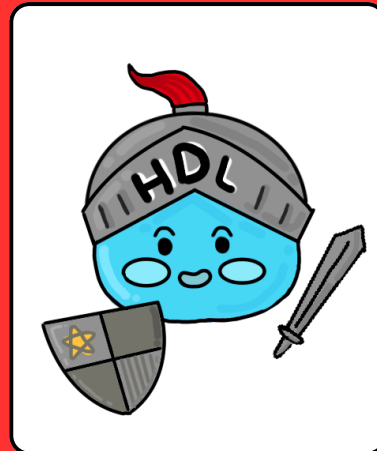

HDL - C 45 mg/dL

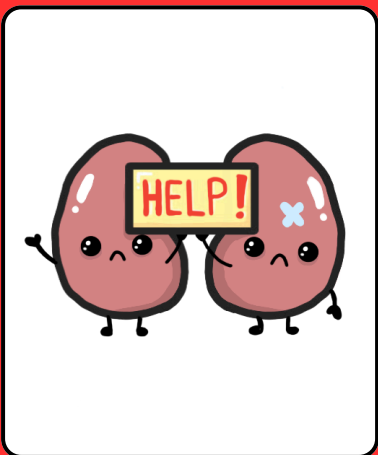

eGFR 40 ml/min/1.73 m<sup>2</sup>

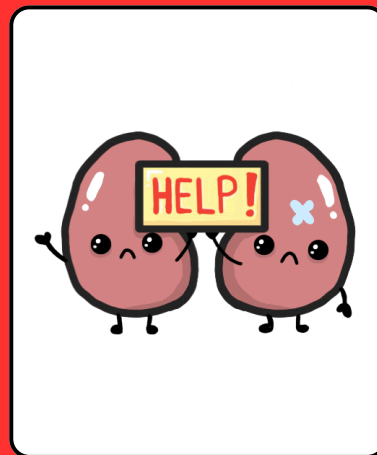

eGFR 50 ml/min/1.73 m<sup>2</sup>

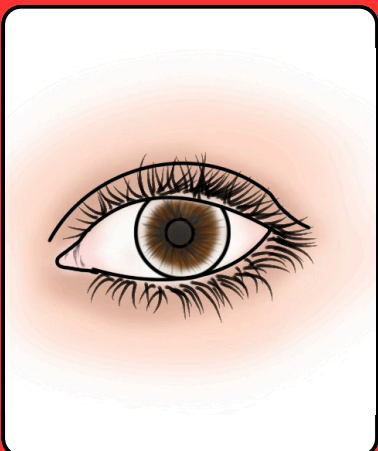

Arcus cornealis

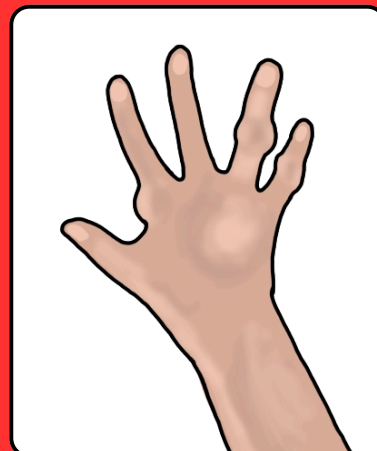

Tuberous xanthoma

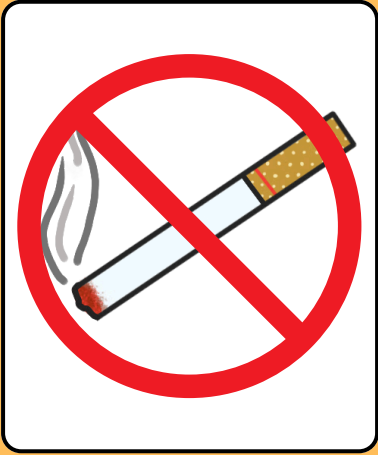

Quit smoking

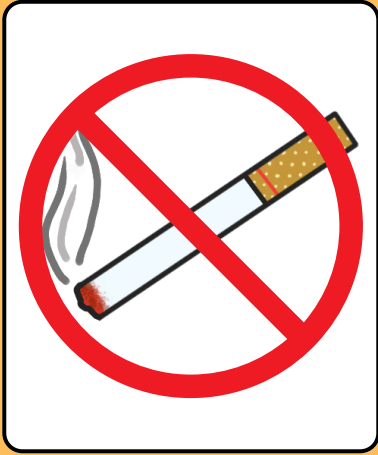

Quit smoking

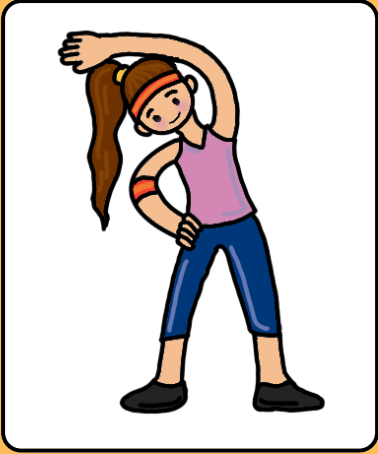

Aerobic exercise  
Moderate intensity exercise  
150 min/week, 3-5 times/week

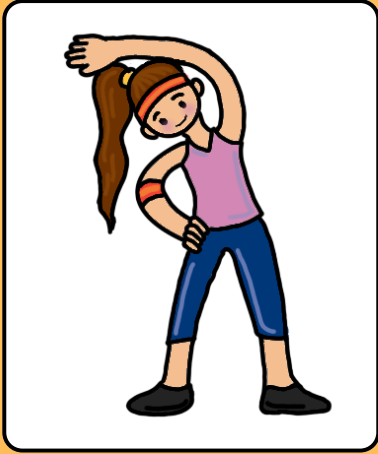

Aerobic exercise  
Moderate intensity exercise  
150 min/week, 3-5 times/week

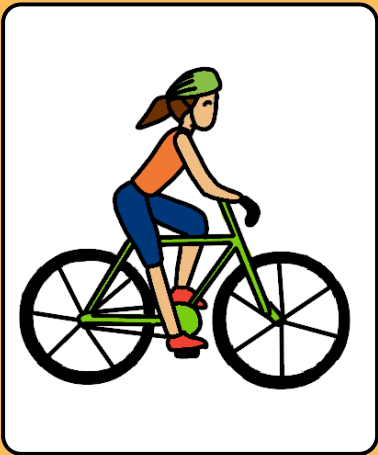

Aerobic exercise  
Vigorous intensity exercise  
75 min/week, 3-5 times/week

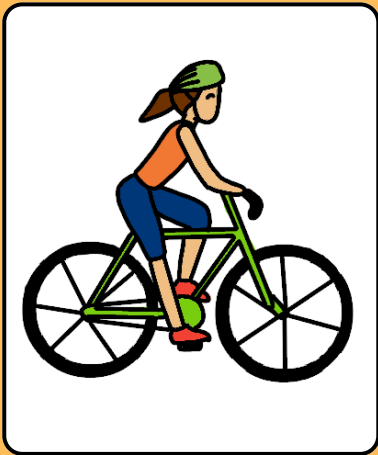

Aerobic exercise  
Vigorous intensity exercise  
75 min/week, 3-5 times/week

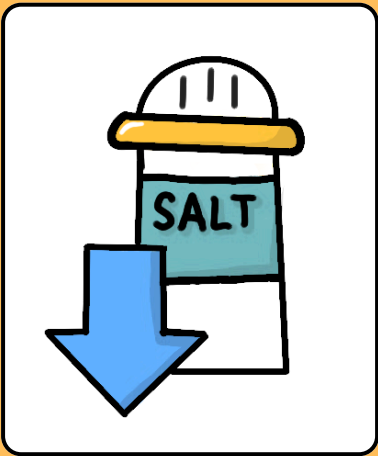

Low salt diet  
Na intake < 2 gm/day

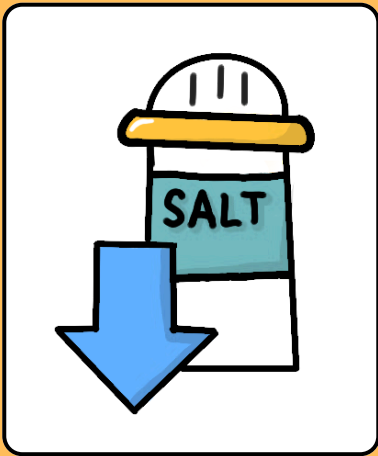

Low salt diet  
Na intake < 2 gm/day

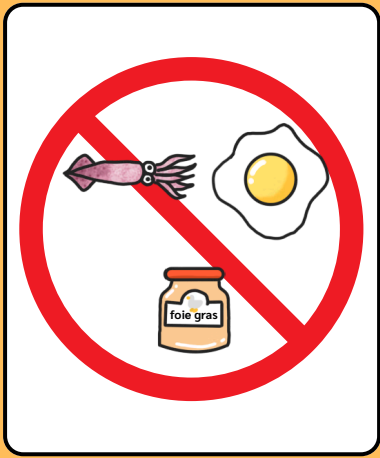

Low cholesterol diet  
Cholesterol intake < 200 mg/day

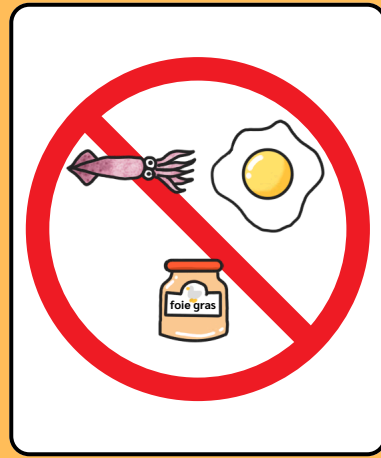

Low cholesterol diet  
Cholesterol intake < 200 mg/day

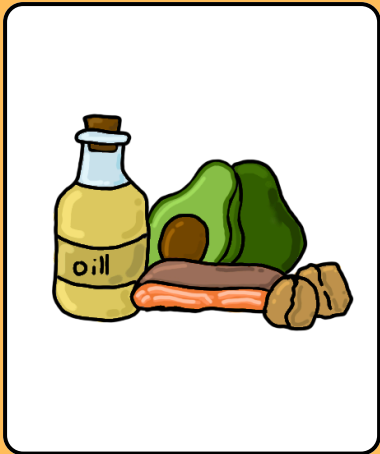

Increased MUFA &  
omega-3 FA

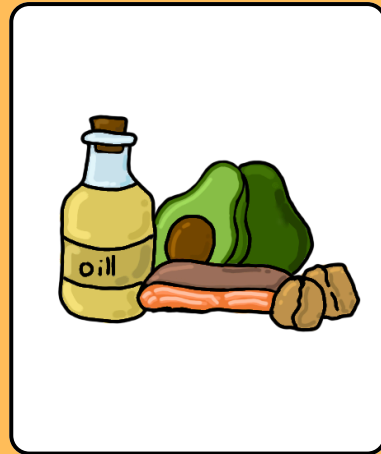

Increased MUFA &  
omega-3 FA

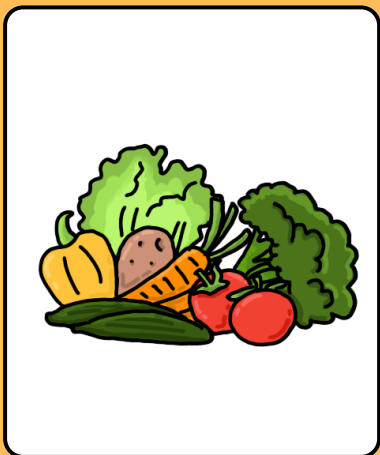

Vegetable  
Vegetable > 5 portions/day

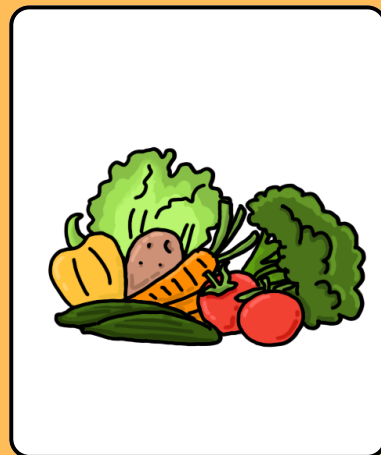

Vegetable  
Vegetable > 5 portions/day

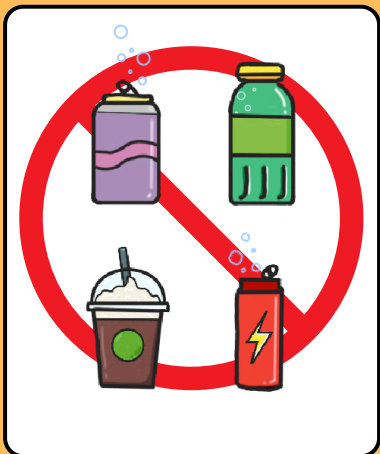

Quit sweetened  
beverage

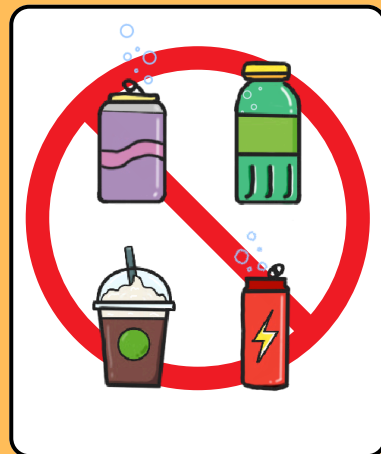

Quit sweetened  
beverage

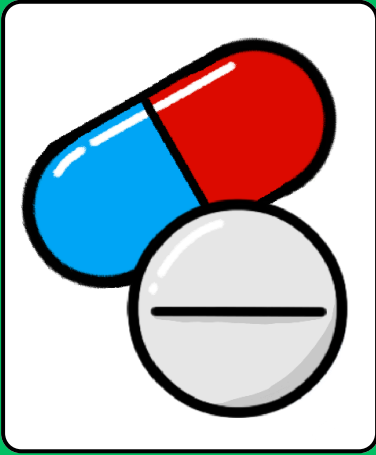

**Metformin**  
500-3000 mg/day

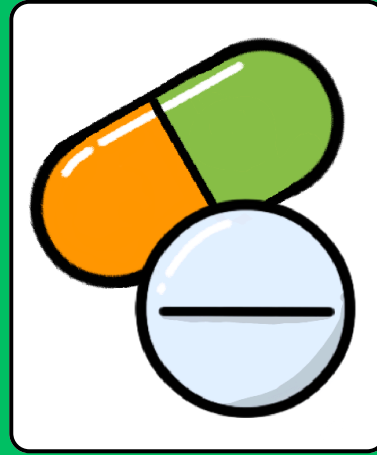

**Glipizide**  
2.5-20 mg/day

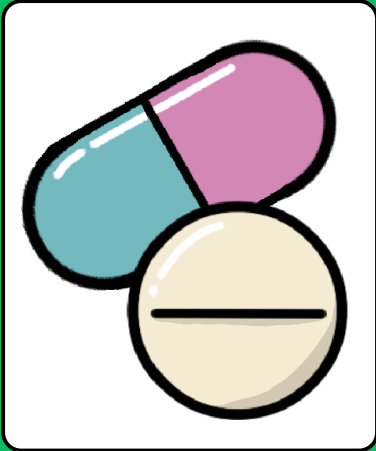

**Pioglitazone**  
15-30 mg/day

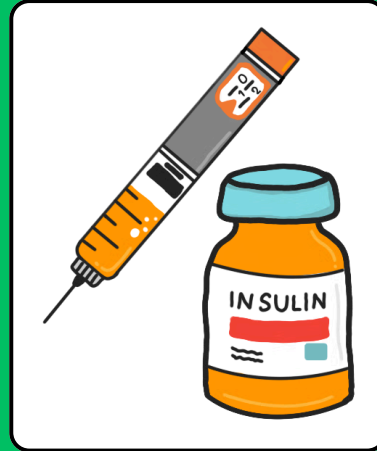

**Insulin**

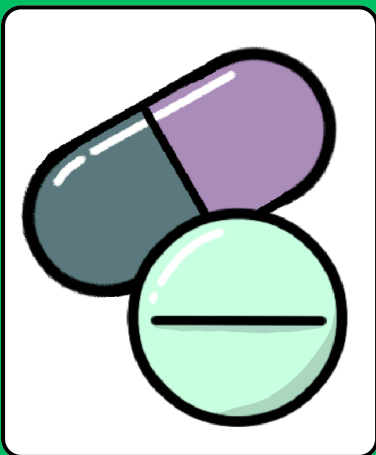

**Enalapril**  
5-40 mg/day

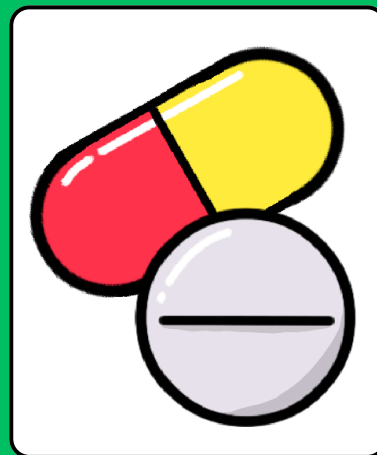

**Losartan**  
50-100 mg/day

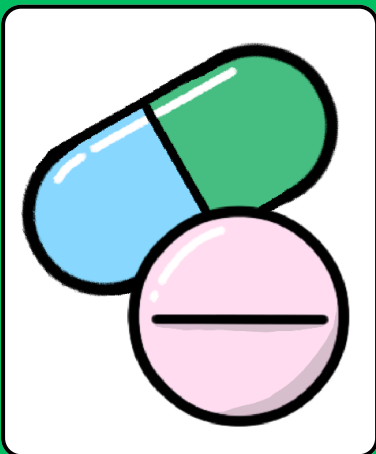

**Amlodipine**  
5-10 mg/day

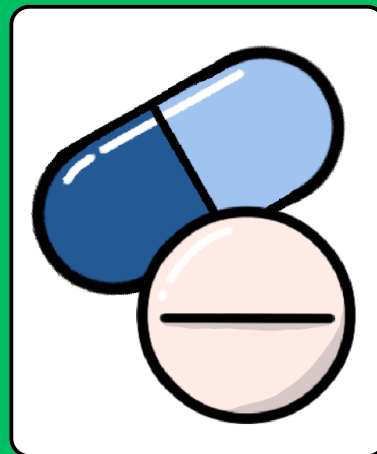

**Manidipine**  
10-20 mg/day

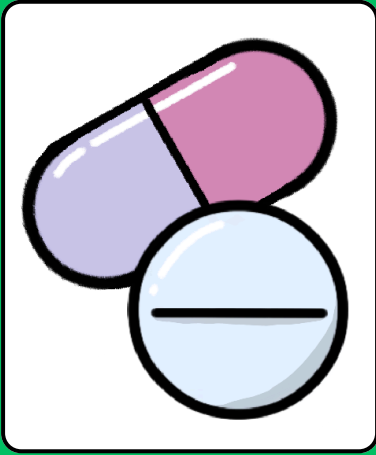

**Simvastatin**  
**40mg/day**  
Moderate intensity statin

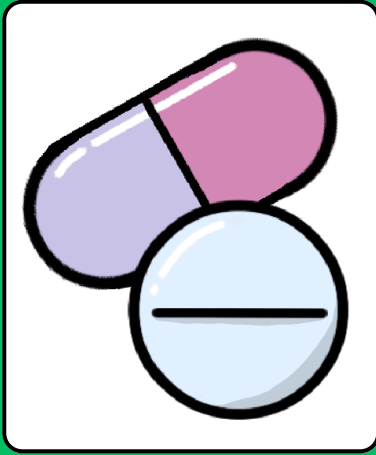

**Simvastatin**  
**40mg/day**  
Moderate intensity statin

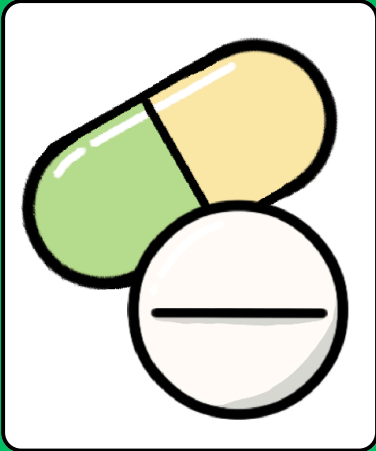

**Atorvastatin**  
**20 mg/day**  
Moderate intensity statin

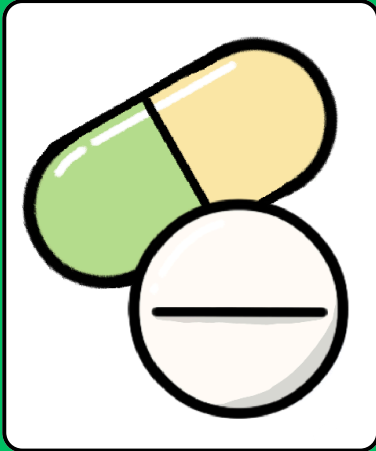

**Atorvastatin**  
**20 mg/day**  
Moderate intensity statin

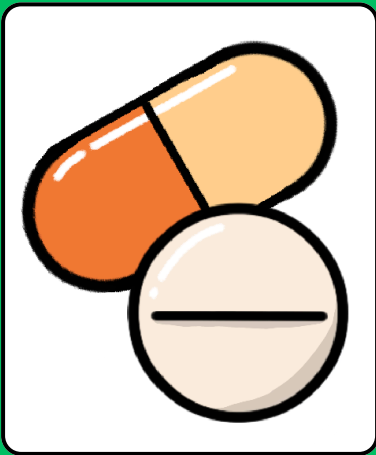

**Atorvastatin**  
**40 mg/day**  
High intensity statin

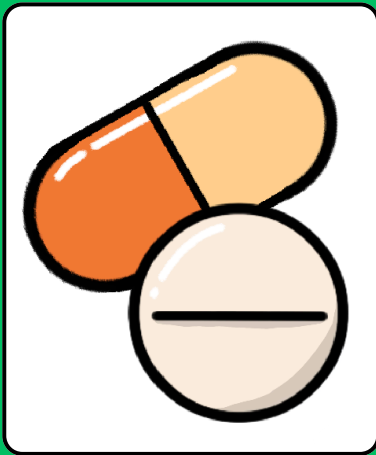

**Atorvastatin**  
**40 mg/day**  
High intensity statin

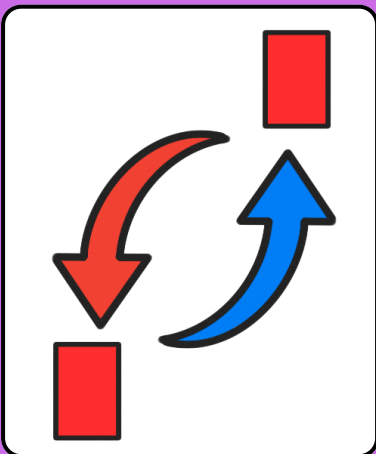

**Swap ASCVD risk  
card**

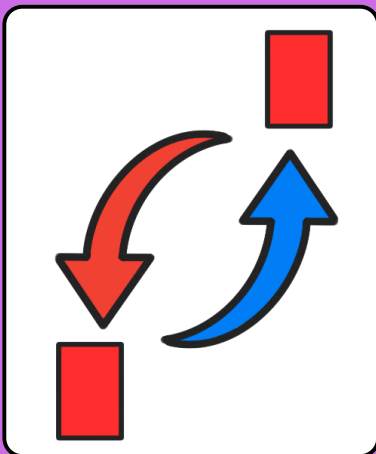

**Swap ASCVD risk  
card**



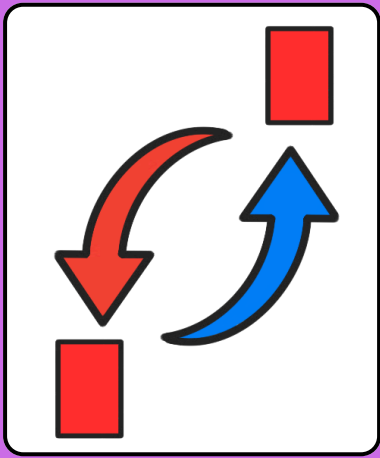

Swap ASCVD risk  
card

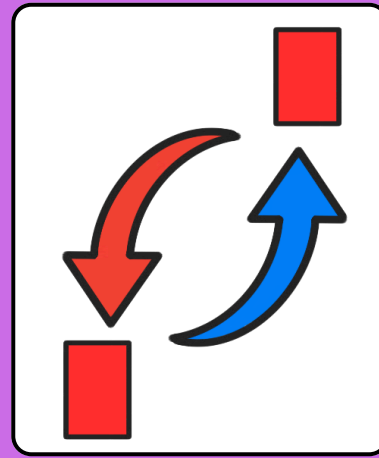

Swap ASCVD risk  
card

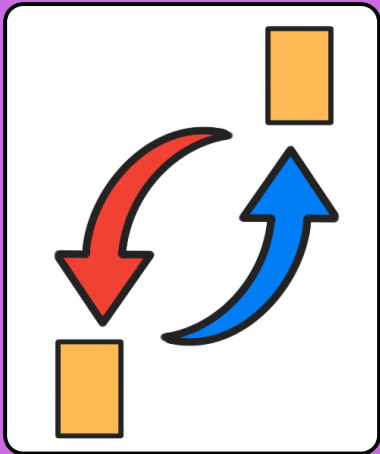

Swap lifestyle  
intervention card

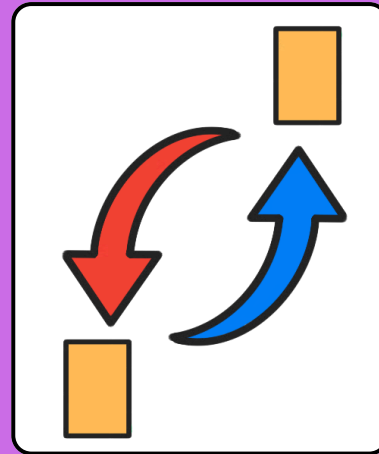

Swap lifestyle  
intervention card

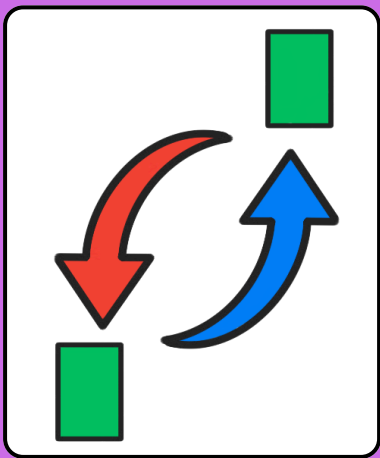

Swap medication  
card

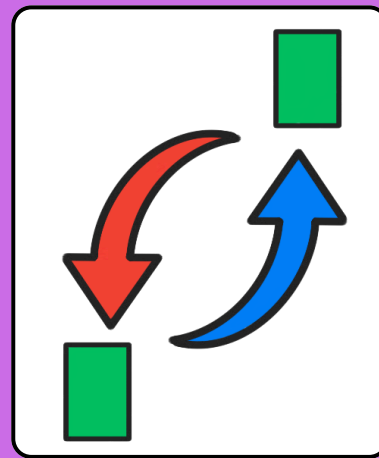

Swap medication  
card

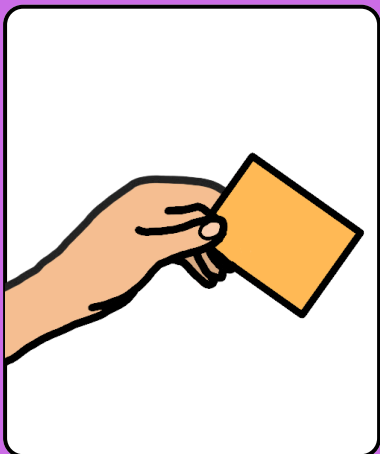

Draw lifestyle  
intervention card

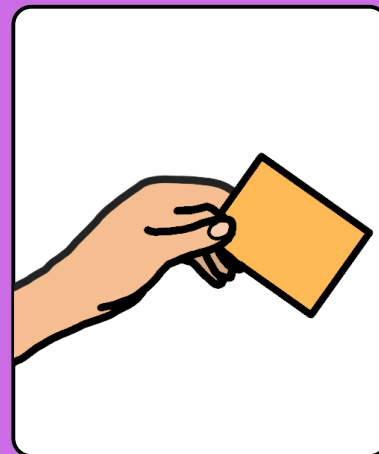

Draw lifestyle  
intervention card

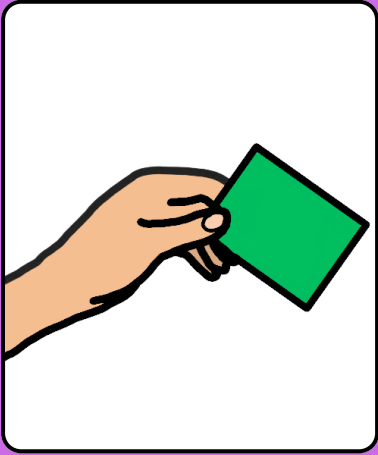

Draw medication  
card

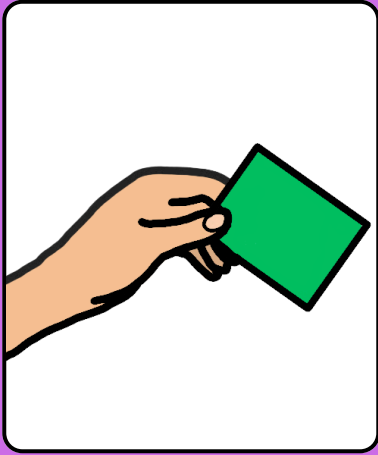

Draw medication  
card

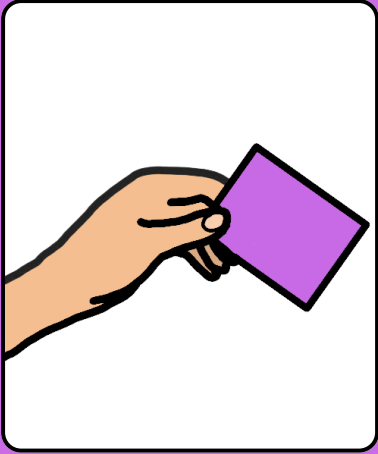

Draw action card

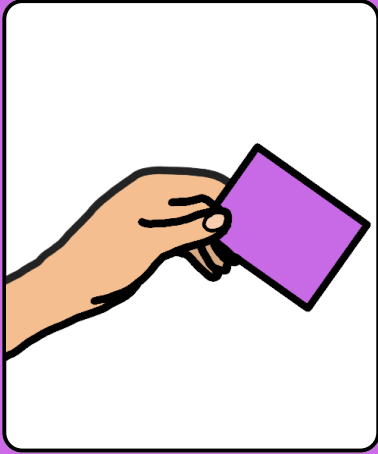

Draw action card

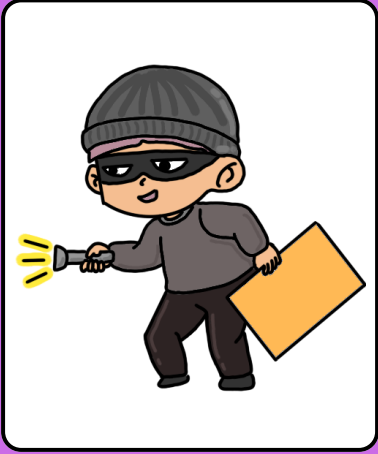

Steal lifestyle  
intervention card

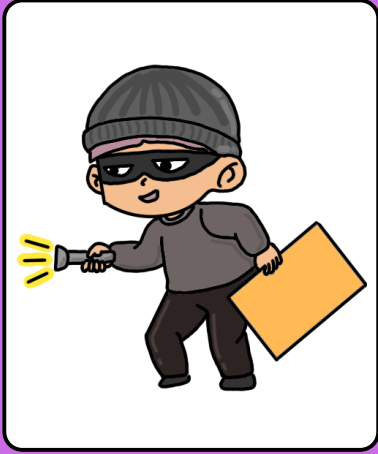

Steal lifestyle  
intervention card

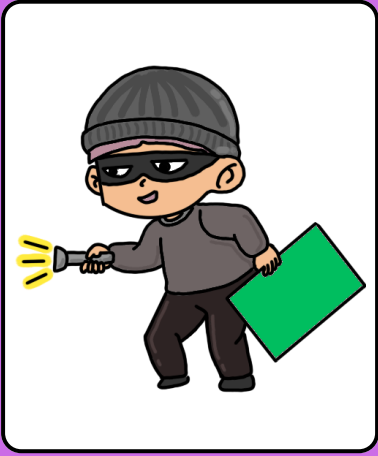

Steal medicaton card

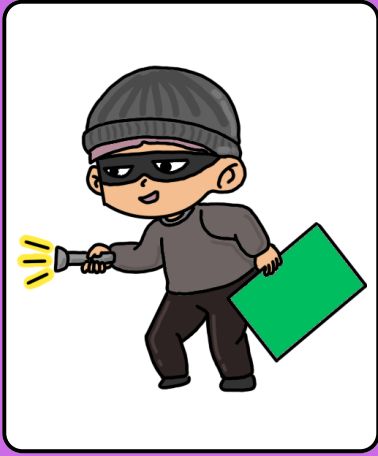

Steal medicaton card

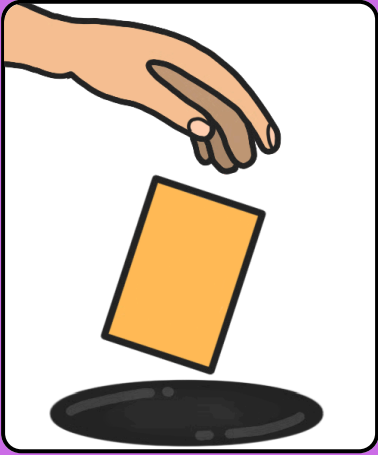

Drop lifestyle  
intervention card

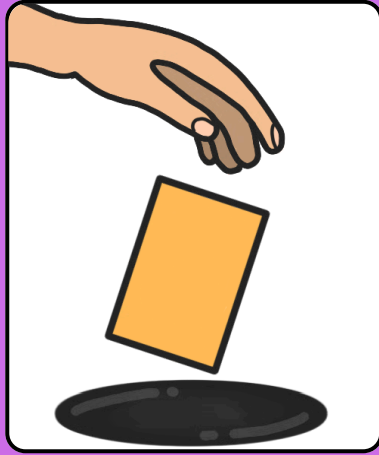

Drop lifestyle  
intervention card

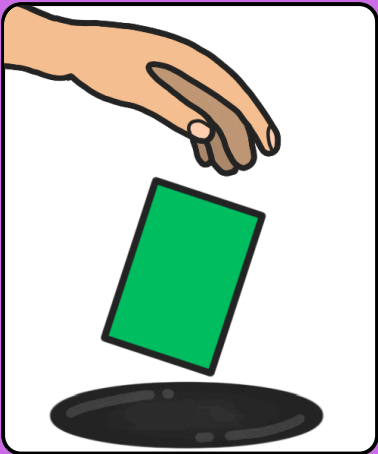

Drop medication card

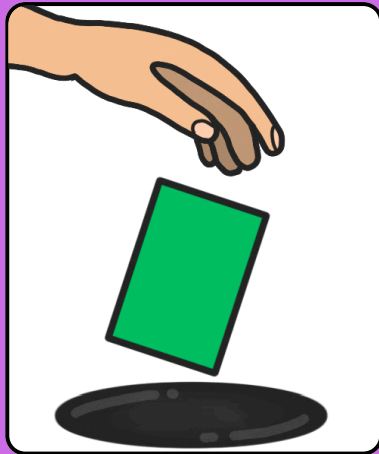

Drop medication card

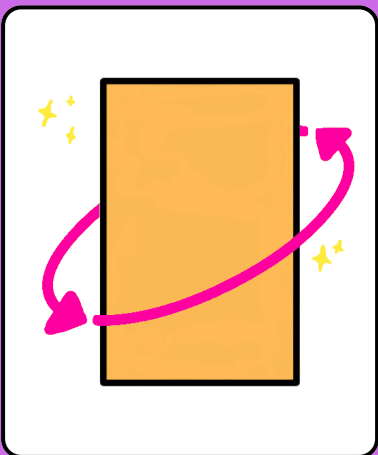

Recall lifestyle  
intervention card

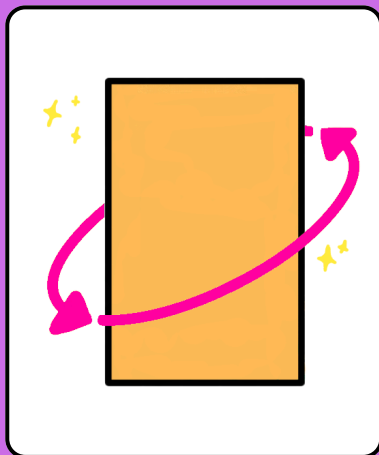

Recall lifestyle  
intervention card

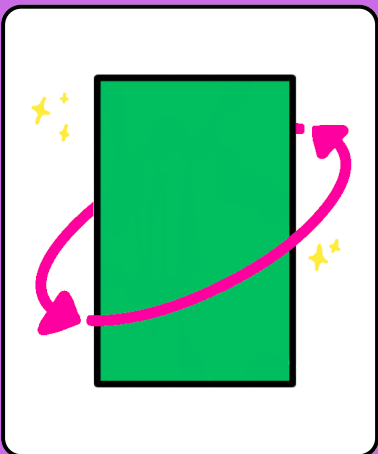

Recall medication  
card

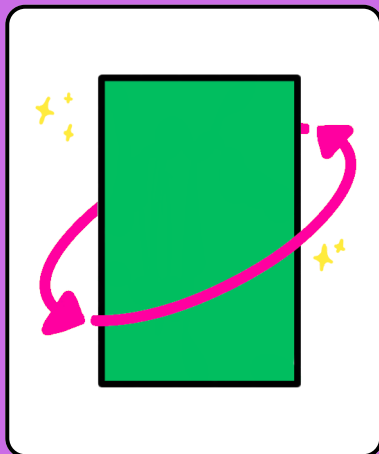

Recall medication  
card
