# Supplementary material for: The study of learning outcome of atherosclerotic cardiovascular disease (ASCVD) prevention by card game added on interactive lecture and group activity
Source: Research Square preprint supplement (doi:10.21203/rs.3.rs-7319496/v1), 2025-09-22
Supplement: Supplementary file 2 [file 7f0fa12b8c88265881f0b508.pdf]

## Perception Survey on the Integration of the ASCVD Prevention Card Game in Interactive Lecture and Group Activity

**Research title:** the study of learning the outcome of atherosclerotic cardiovascular disease (ASCVD) prevention from card game added in the interactive lecture and group activity

### Primary objective

To assess the learning outcomes associated with the integration of the ASCVD Prevention Card Game in the interactive lecture and group-based educational activity.

### Secondary objective

To explore medical students' perceptions regarding the educational value and engagement of the ASCVD Prevention Card Game.

### Clarification

Please mark ✓ in the box most representing your opinion about the ASCVD Prevention Card Game.

**Scoring criteria**

- 5: Strongly agree
- 4: Agree
- 3: Not sure
- 2: Disagree
- 1: Strongly disagree

| Topic                                                                                                        | 5 | 4 | 3 | 2 | 1 |
|--------------------------------------------------------------------------------------------------------------|---|---|---|---|---|
| <u>Content of the ASCVD Prevention Card Game</u>                                                             |   |   |   |   |   |
| The ASCVD Prevention Card Game suited my knowledge level.                                                    |   |   |   |   |   |
| The ASCVD Prevention Card Game fully covered the key concepts of the ASCVD prevention course.                |   |   |   |   |   |
| The ASCVD Prevention Card Game was aligned to the intended learning outcomes of the ASCVD prevention course. |   |   |   |   |   |
| The ASCVD Prevention Card Game was easy to understand.                                                       |   |   |   |   |   |
| <u>Medical student's game engagement and participation</u>                                                   |   |   |   |   |   |
| I enjoyed playing the ASCVD Prevention Card Game.                                                            |   |   |   |   |   |

| Topic                                                                                                                | 5 | 4 | 3 | 2 | 1 |
|----------------------------------------------------------------------------------------------------------------------|---|---|---|---|---|
| I was enthusiastic to be engaged in playing the ASCVD Prevention Card Game.                                          |   |   |   |   |   |
| It was my great opportunity to play the ASCVD Prevention Card Game.                                                  |   |   |   |   |   |
| The time ran too fast while I was playing the CVD Prevention Card Game.                                              |   |   |   |   |   |
| I wanted to play the ASCVD Prevention Card Game more.                                                                |   |   |   |   |   |
| <u>Effectiveness of the ASCVD Prevention Card Game in promoting learning ability</u>                                 |   |   |   |   |   |
| The ASCVD Prevention Card Game enhanced my learning motivation.                                                      |   |   |   |   |   |
| The ASCVD Prevention Card Game helped me mesmerize the knowledge of ASCVD prevention                                 |   |   |   |   |   |
| The ASCVD Prevention Card Game made me understand ASCVD prevention more clearly.                                     |   |   |   |   |   |
| The ASCVD Prevention Card Game was useful for applying the knowledge of ASCVD prevention principles in patient care. |   |   |   |   |   |
